# Supplementary material
Source: HighWire-hosted journal article supplement (https://bmjopenquality.bmj.com/content/5/1/u212920.w5661)
Supplement: inline-supplementary-material-3 [file inline-supplementary-material-3.pdf]

|                                                                                                                       | Before Median (IQR) | After Median (IQR) | p value           |
|-----------------------------------------------------------------------------------------------------------------------|---------------------|--------------------|-------------------|
| PHM Handoff process provided/provides me the necessary information to manage patients during my shift.                | 4 (2-4)             | 4 (4-5)            | <b>0.0005</b>     |
| PHM Handoff process facilitated/facilitates good communication.                                                       | 3 (2-4)             | 4.5 (4-5)          | <b>&lt;0.0001</b> |
| What percentage of the time did/does the PHM Handoff process prioritize the sickest patients on the floor?            | 3 (3-4)             | 5 (4-5)            | <b>0.0009</b>     |
| What percentage of the time did/does the PHM Handoff process result in preventable clinical issues or adverse events? | 2 (1-2)             | 1 (1-2)            | 1.0000            |
| I was/am satisfied with the PHM Handoff process.                                                                      | 3 (2-4)             | 4 (4-5)            | <b>0.0004</b>     |
| The PHM Handoff process promoted/promotes <i>patient safety</i> .                                                     | 3 (3-4)             | 5 (4-5)            | <b>&lt;0.0001</b> |
| The PHM Handoff process promoted/promotes <i>timeliness</i> .                                                         | 3 (2-3)             | 4 (4-4)            | <b>0.0011</b>     |
| The PHM Handoff process promoted/promotes <i>effectiveness</i> .                                                      | 3 (3-4)             | 4 (4-4)            | <b>0.0020</b>     |
| The PHM Handoff process promoted/promotes <i>efficiency</i> .                                                         | 3 (3-3)             | 4 (4-4)            | <b>0.0002</b>     |
| The PHM Handoff process promoted/promotes <i>equity</i> .                                                             | 3 (3-4)             | 4 (3-4)            | 0.5000            |
| The PHM Handoff process promoted/promotes <i>patient centered care</i> .                                              | 3 (3-4)             | 4 (4-4)            | <b>0.0313</b>     |

**Table 2.** Medians from physician perception survey, with statistical significance calculated via Signed Rank Test.
